# Supplementary material for: Classifying Non-Small Cell Lung Cancer Histopathology Types and Transcriptomic Subtypes using Convolutional Neural Networks
Source: bioRxiv or medRxiv preprint supplement (doi:10.1101/530360), 2019-01-25

## Supplemental Figure 1

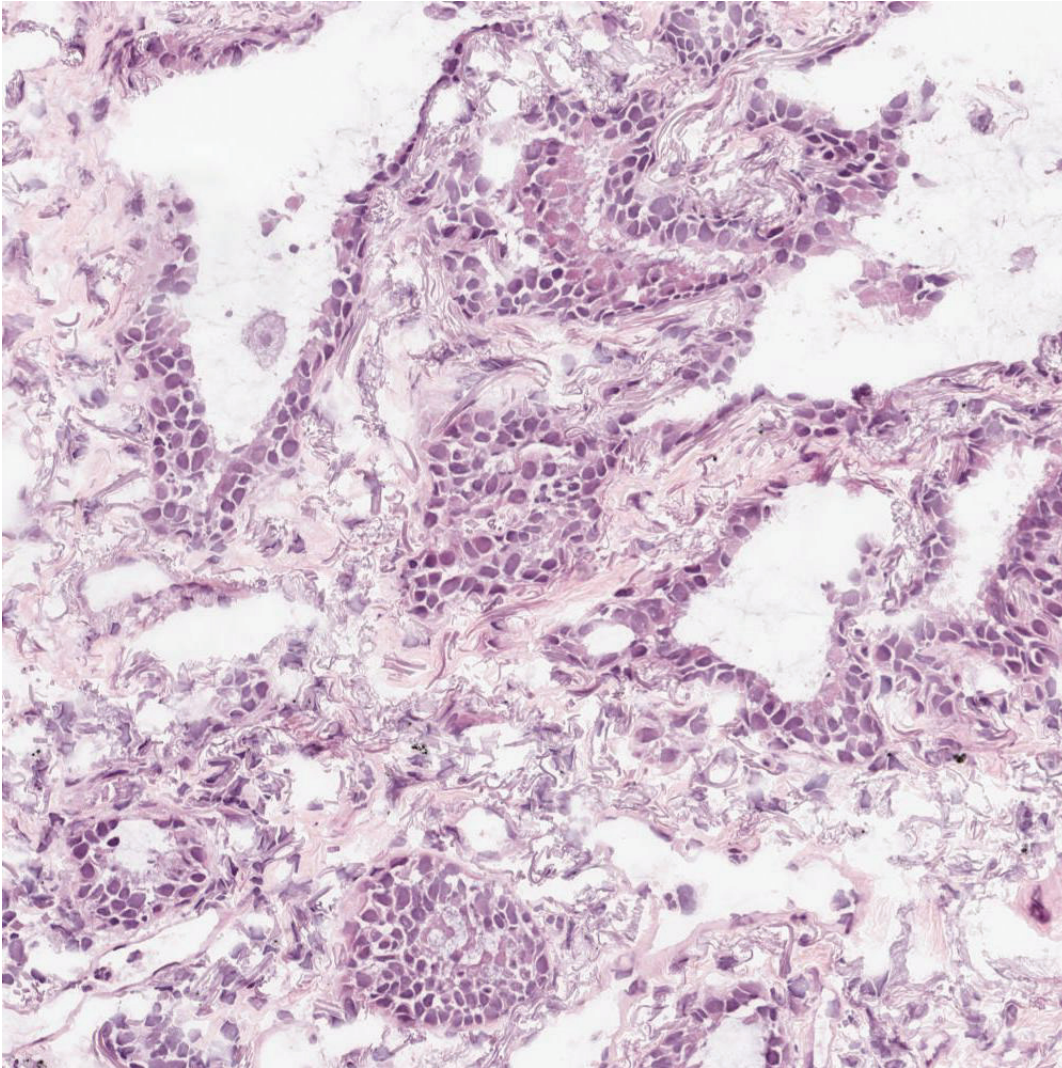

# Supplemental Figure 2

A

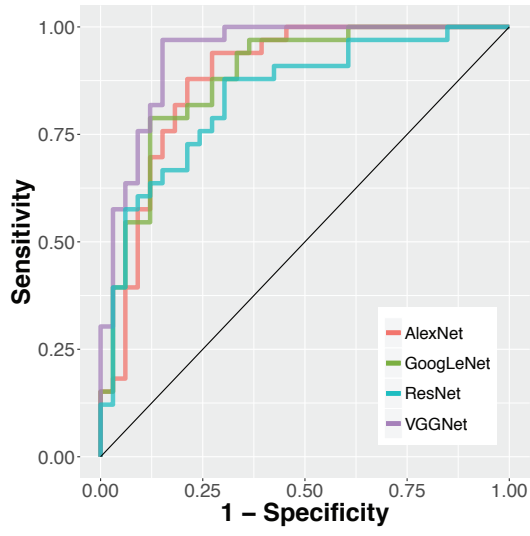

B

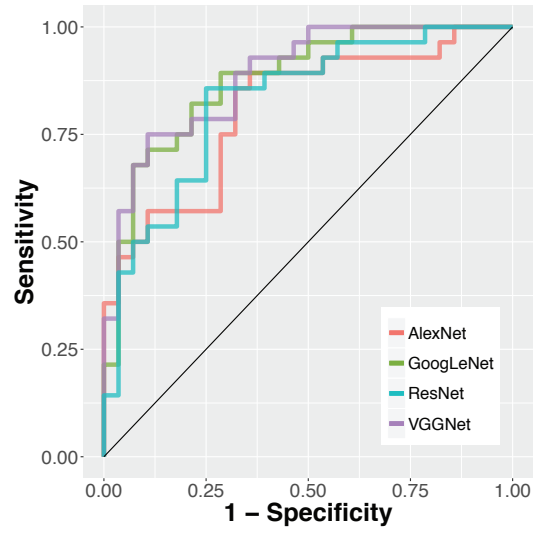

C

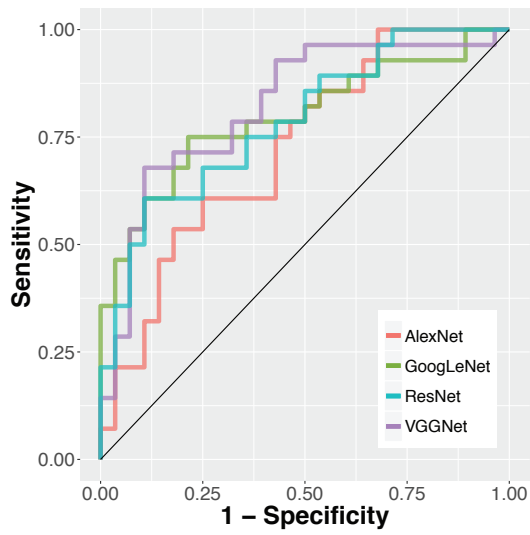

# Supplemental Figure 3

A

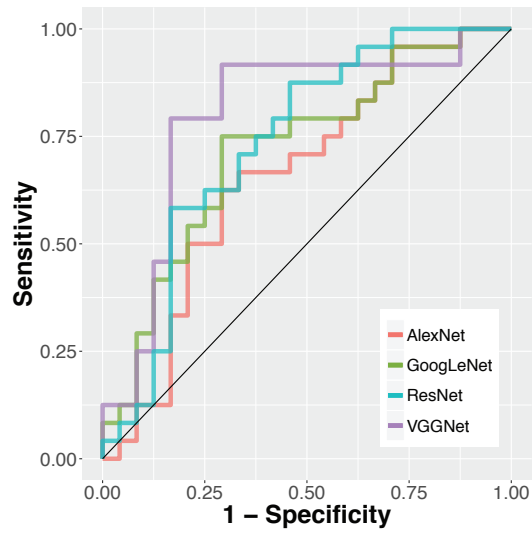

B

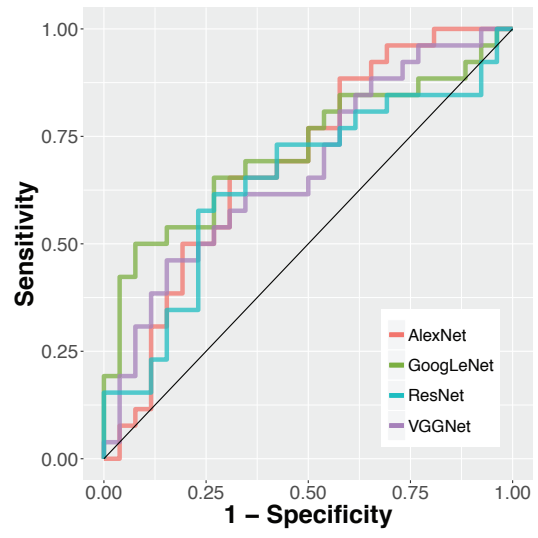

Supplement: Supplementary file [file media-1.pdf]
